# Supplementary material for: Ultrasensitive detection of mercury(ii) ions on a hybrid film of a graphene and gold nanoparticle-modified electrode
Source: Royal Society of Chemistry journal article supplement (doi:10.1039/d2ay00413e), 2022-01-01
Supplement: d2ay00413e1.pdf [file d2ay00413e1.pdf]

## Supporting information

### Ultrasensitive detection of mercury(II) ion on hybrid film of graphene and gold nanoparticle-modified electrode

Dongmin Shi<sup>a,\*</sup>, Wenzhan Wu<sup>a</sup>, Xiaoyuan Li<sup>a</sup>

<sup>a</sup>Department of Chemistry, the Hong Kong University of Science and Technology, Kowloon,  
Hong Kong S.A.R., China

\*Corresponding author.

*Email address:* [dshiaa@connect.ust.hk](mailto:dshiaa@connect.ust.hk) (D. M. Shi).

## Contents

**Fig. S1: Characterization of the as-fabricated AuNPs/ERGO/SPCE electrode by SEM.** (A) deposition time: 75s,  $\times 100,000$ ; (B) deposition time 50s,  $\times 100,000$ .

**Fig. S2: Optimization of the fabrication conditions of AuNPs/ERGO/SPCE electrode.** (A) Effects of the AuNPs deposition potential, (B) Effect of the AuNPs deposition time, (C) Effect Hg deposition potential and (D) Effect of Hg deposition time toward 5  $\mu\text{g/L}$   $\text{Hg}^{2+}$  detection in buffer solution.

**Table S1:** Comparison of our electrochemical method with previously reported methods by others for the detection of  $\text{Hg}^{2+}$  in aqueous phase.

**References cited.**

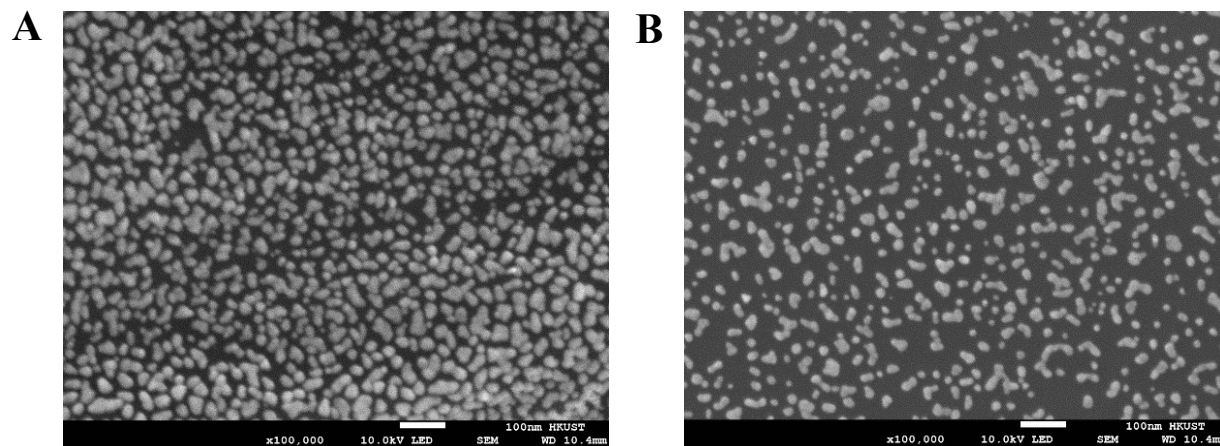

**Fig. S1** SEM images of the surface of AuNPs/ERGO/SPCE with different deposition time. (A) 75s,  $\times 100,000$ ; (B) 50s,  $\times 100,000$ .

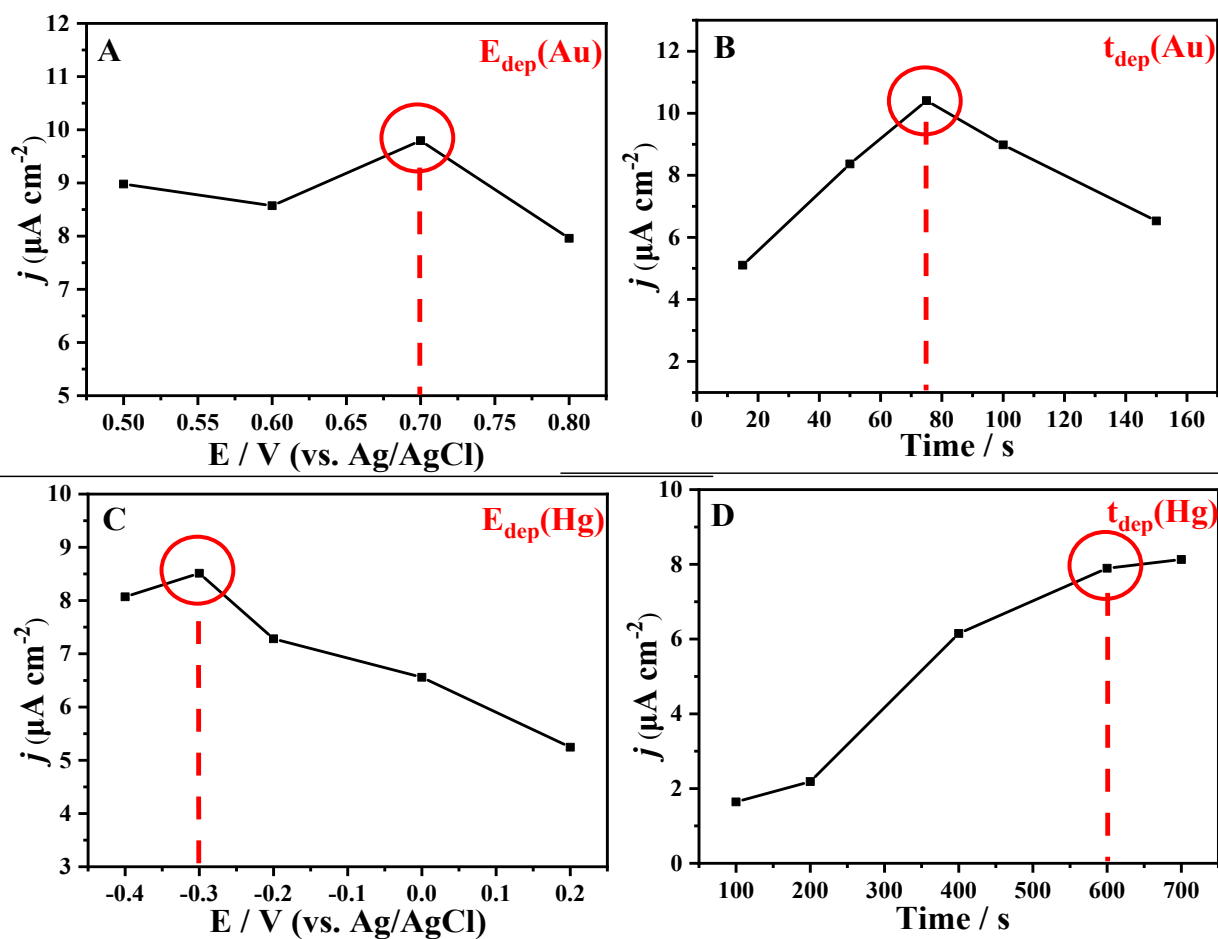

**Fig. S2** (A) Effects of the AuNPs deposition potential, (B) Effect of the AuNPs deposition time, (C) Effect Hg deposition potential and (D) Effect of Hg deposition time toward  $5 \mu\text{g/L Hg}^{2+}$  detection in buffer solution.

**Table S1:** Comparison of our electrochemical method with several previously reported methods by others for the detection of Hg<sup>2+</sup>.

| Probe                                            | Method           | Linear range<br>(µg/L) | LOD<br>(µg/L) | R <sup>2</sup> | Ref. |
|--------------------------------------------------|------------------|------------------------|---------------|----------------|------|
| Thiol-functionalized<br>AgNPs                    | SERS             | 2-400                  | 0.48          | 0.996          | 1    |
| Quantum dot/DNA/AuNPs<br>ensemble                | Fluorometry      | 0.4-12                 | 0.4           | 0.997          | 2    |
| N-acetyl-L-cysteine/AuNPs                        | Colorimetry      | 4-20                   | 1.98          | 0.986          | 3    |
| g-C <sub>3</sub> N <sub>4</sub> /CQDs composites | ICP-MS           | 0.01–100               | 0.008         | 0.993          | 4    |
| This study                                       | Electrochemistry | 0.5-10                 | 0.06          | 0.998          | /    |

## References:

1. Y. Chen, L. Wu, Y. Chen, N. Bi, X. Zheng, H. Qi, M. Qin, X. Liao, H. Zhang and Y. Tian, *Microchimica Acta*, 2012, **177**, 341-348.
2. A. M. Ashrafi and K. Vytřas, *Talanta*, 2011, **85**, 2700-2702.
3. J. Tang, P. Wu, X. D. Hou and K. L. Xu, *Talanta*, 2016, **159**, 87-92.
4. J. Zhou, Y. Tian, X. Wu and X. Hou, *Microchemical Journal*, 2017, **132**, 319-326.
